# Supplementary material
Source: HighWire-hosted journal article supplement (https://qdcxjkg.com/highwire/filestream/114238/field_highwire_adjunct_files/0/Determinants_of_asthma_inhaler_adherence_in_adults_-_SM1_Protocol.pdf)
Supplement: Determinants_of_asthma_inhaler_adherence_in_adults_-_SM1_Protocol.pdf [file Determinants_of_asthma_inhaler_adherence_in_adults_-_SM1_Protocol.pdf]

# DETERMINANTS OF ASTHMA INHALER USE IN ADULTS: SYSTEMATIC REVIEW OF OBSERVATIONAL STUDIES

## SUPPLEMENTARY MATERIAL 1: STUDY PROTOCOL

### FIRST PROTOCOL

#### OBJECTIVE

To identify studies that report determinants of adherence to medication use

#### SEARCH - performed 6 June 2012 and updated 26 June 2014

**Search Syntax:** Asthma AND (adherence OR persistence OR compliance OR concordance) AND (determin\* OR caus\* OR influenc\* OR barrier\* OR factor OR factors OR reason OR reasons OR facilitat\*) in All text

**Databases:** EMBASE & Medline (via Ovid) + PsychInfo & PsychArticles (via EBSCO)

#### Detailed search syntax:

***For EBSCO:***

TX Asthma AND (adherence OR persistence OR compliance OR concordance) AND (determin\* OR caus\* OR influenc\* OR barrier\* OR factor OR factors OR reason OR reasons OR facilitat\*)

[http://search.ebscohost.com/login.aspx?direct=true&db=pdh&db=psyh&bquery=TX+\(Asthma+AND+\(adherence+OR+persistence+OR+compliance+OR+concordance\)+AND+\(determin\\*+OR+caus\\*+OR+influenc\\*+OR+barrier\\*+OR+factor+OR+factors+OR+reason+OR+reasons+OR+facilitat\\*\)\)&cli0=PY&clv0=199001-000001&cli1=RV&clv1=Y&dli0=DX1&dlv0=Y&dld0=psyh&type=1&site=ehost-live](http://search.ebscohost.com/login.aspx?direct=true&db=pdh&db=psyh&bquery=TX+(Asthma+AND+(adherence+OR+persistence+OR+compliance+OR+concordance)+AND+(determin*+OR+caus*+OR+influenc*+OR+barrier*+OR+factor+OR+factors+OR+reason+OR+reasons+OR+facilitat*))&cli0=PY&clv0=199001-000001&cli1=RV&clv1=Y&dli0=DX1&dlv0=Y&dld0=psyh&type=1&site=ehost-live)

| Database     | Limiters Applied                                                                                 |
|--------------|--------------------------------------------------------------------------------------------------|
| PsycARTICLES | Year of Publication from: 1990-;<br>Scholarly (Peer Reviewed) Journals                           |
| PsycINFO     | Year of Publication from: 1990-;<br>Scholarly (Peer Reviewed) Journals;<br>Exclude Dissertations |

Results = 567

***For Ovid:***

(Asthma and (adherence or persistence or compliance or concordance) and (determin\* or caus\* or influenc\* or barrier\* or factor or factors or reason or reasons or facilitat\*)).tw. = 4051

Limit to humans = 3611

Limit to 1990 – current = 3414

Deduplicated = 1975

***Deduplicated ebSCO + ovid = 2324***

**2014 update:**

**EBSCO: 83; Ovid: 580; Deduplicated: 618; New: 554**

**CODING STUDY RELEVANCE FOR REVIEW OBJECTIVE**

This first step aims to identify empirical studies that assess determinants of medication adherence in asthma. Theoretical and methodological articles and reviews are coded separately for general orientation.

**Coding procedure:**

1. In Endnote: use custom columns to define the following fields:

Edit → preferences → display fields

Column 1 – author

Column 2 – year

Column 3 – title

Column 4 – custom 1 - relevance

Column 5 – custom 2 - methodology

Column 6 – custom 3 - age

Column 7 – custom 4 - language & country

Column 8 – custom 5 - medication

2. For each paper, first code the relevance based on info from title and abstract (preview):

Go to quick edit → custom 1 and code:

1. **relevant** – empirical study on determinants of asthma medication use (observational studies)
2. irrelevant – empirical study on determinants of other adherence behaviours (inhaler technique, monitoring, trigger management, exacerbation management)
3. irrelevant – review on determinants of asthma medication use & other asthma care behaviours
4. irrelevant – adherence intervention or asthma management interventions targeting other outcomes
5. irrelevant – adherence measurement study
6. irrelevant – study on longitudinal relationship adherence (time1) and treatment outcomes (time2) (note: if relationship is cross-sectional or outcomes precede adherence, study qualifies as relevant!)
7. **relevant** – adherence and asthma care (observational studies examining the role of health care professionals' behaviours in patients' adherence to asthma treatment)
8. irrelevant – effectiveness/safety of an asthma-related treatment (drug treatments)
9. irrelevant – studies unrelated to asthma
10. irrelevant – measurement of burden of asthma
11. irrelevant – general guidelines for asthma
12. irrelevant – asthma-related questionnaire evaluation/development (include diagnostic tests as well)
13. irrelevant – use of treatments in clinical practice or physicians adherence to guidelines
14. irrelevant – other studies on asthma (descriptives, risk factors, ...)

3. Then code the next 5 custom fields only for relevant empirical studies.

custom 2 - methodology:

1. qualitative - interviews
2. qualitative - focus groups
3. quantitative - cross-sectional
4. quantitative - longitudinal

custom 3 - age – record age category (e.g. children/adults) or interval (years) as presented in the abstract/title

custom 4 - language & country – record language &/or country if info is presented in the abstract

custom 5 - medication – record medication type (e.g. inhaled corticosteroids, oral corticosteroids, bronchodilators, LABA, SABA) if info presented in the abstract/title

custom 6 – sample size – record sample size if info presented in the abstract/title

Examples:

Emtner, M., M. Finne, et al. (1998). "A 3-year follow-up of asthmatic patients participating in a 10-week rehabilitation program with emphasis on physical training."

Relevance: 4 (asthma management intervention)

Dykewicz, M. S. (2003). "7. Rhinitis and sinusitis."

Relevance: 9 (irrelevant – unrelated to asthma)

Lertchanaruengrith, P., P. Rattanasukol, et al. (2012). "The ability and predictive factors of preschool children to use swinghaler device."

Relevance: 2 (age as determinant of effective inhaler technique?)

### **Inter-rater agreement and reconciliation:**

For 2 relevance categories (recoded 1 and 7 as relevant and the remaining codes as irrelevant): 304 were coded as categories 1 and 7, 144 represented agreements between the 2 coders, 160 were selected by only one of the coders (Cohen's Kappa = .60).

Reconciliation: a third coder reviewed the 160 disagreements

65 studies were selected as potentially relevant.

209 studies were included in further analyses, with the following characteristics:

Characteristics of selected articles:

|            |                      |
|------------|----------------------|
| Methods:   | Cross-sectional: 218 |
|            | Longitudinal: 43     |
|            | Qualitative: 25      |
|            | No info: 13          |
| Age group: | Children (<18): 103  |
|            | Adults (>18): 80     |
|            | Both: 37             |

|             |                                                    |
|-------------|----------------------------------------------------|
|             | No info: 79                                        |
| Country:    | No info: 150                                       |
|             | US: 57                                             |
|             | Multiple countries; 9                              |
|             | UK: 9                                              |
|             | Netherlands: 9                                     |
|             | (several other countries with less than 5 studies) |
| Medication: | Generic or unspecified: 160                        |
|             | Inhaled (ICS, LABAs, SABAs): 112                   |
|             | Other types (LTRA, OCS): 14                        |
|             | Both inhaled and other types: 10                   |

**2014 update:**

**Ovid:** of 554 studies, 144 were coded as relevant, 69 represented agreements between the 2 coders, 75 were selected by only one of the coders (update selection Cohen's Kappa = .56).

Reconciliation: a third coder reviewed the 75 disagreements, and selected 21 studies as potentially relevant.

90 additional studies were included in further analyses

**Identification of previous systematic reviews relevant for the review objective:**

Code 3 entries were examined to select articles that mention in the abstract at least a procedure for searching and selecting papers as part of the review process. The following information was extracted from the manuscripts:

- a. the objective (what adherence behaviour(s), if medication use - what type of medication, what age group, etc.)
- b. the eligibility criteria for the inclusion of papers
- c. the type of data they have extracted
- d. any conclusions relevant for the topic

## Summary:

We identified only 2 reviews that focus on asthma adherence determinants and describe clear procedures for databases search, article selection, and data extraction. They both focus on ICS adherence, one in children (Drotar & Bonner, 2009), the other in adults (Charles, Ninot, & Sultan, 2011).

The first reviews both longitudinal and cross-sectional studies published before 2009 (PubMed, PsychInfo, CINAHL, EBSCO) on determinants of adherence to ICS in children with persistent asthma (up to 18 years). The authors exclude qualitative studies and studies without specific ICS adherence measurement (i.e. combined/generic measures of adherence behaviours). They identify 27 articles and report on sample size, design, race, age, determinants measurement, adherence measurement, and results. They classify the determinants into 5 domains: (1) family demographic characteristics and functioning; (2) parent characteristics; (3) child characteristics; (4) health care system and provider variables; and (5) child health outcomes. They provide methodological recommendations for future research (prospective design, hypothesis-driven, multivariate models, reliable and valid measures), and highlight gaps in the determinants literature (child behaviours and beliefs, extended family behaviours and beliefs, health care system & care process characteristics, peer influence).

The latter focuses only on studies that examine the relationship between patient illness and treatment perceptions and adherence to ICS in adults with asthma. The authors review the literature following (Horne & Weinman, 1999) article on the extended self-regulatory model in asthma, up to 2009 (Pubmed, PsycInfo, Scopus; English and French). They identify 28 articles and report the type of representation (asthma or treatment or both), the language & location, design (qualitative/quantitative, cross-sectional/longitudinal), sample (N, age, gender distribution, duration of asthma), measure of adherence (qre ad-hoc, validated qre), measurement of illness perceptions (IPQ, BMQ, ad-hoc qre, interview). They provide summary data on treatment and illness perceptions associated with adherence: illness identity, perceived control, perceptions of illness timeline, causality, and consequences, and perceptions of treatment necessity and concerns (e.g. fear of side-effects, perception of low efficacy, belief that the prescribed dose is too high, fear of dependency). They also include a methodological discussion on the assessment of adherence and illness/treatment beliefs, the strength and causal direction of the relationship between beliefs and adherence.

In conclusion, there are only two systematic literature reviews that focus specifically on determinants of asthma treatment adherence (ICS); the rest of the reviews do not provide a comprehensive examination of adherence as a main topic of investigation. Thus, there is sufficient scope for new systematic reviews on asthma adherence determinants.

However, given that first review focused on studies up to 2009 and the quality of the review is good, ***a new systematic review on asthma adherence in children is less of a priority.***

By contrast, there is a ***clear need for a systematic review on treatment adherence in adults with asthma***, as the latter study only focuses on the self-regulatory model, and we have found no review that would include a ***broader range of determinants at both patient and health care professional level, and develop a logic model of adherence determinants.*** As there are numerous studies on asthma adherence determinants in adults, the review will have to be

restricted on type of medication (focus only on ICS and LABA use), and/or methodology (focus on quantitative studies, or perhaps only on longitudinal studies).

## **SECOND PROTOCOL**

### **OBJECTIVE**

Based on the results of the first protocol, we decided to focus on quantitative observational studies that examine determinants of adherence to inhaled medication in adults with asthma.

### **STUDY CHARACTERISTICS CHECK**

2 coders confirmed & completed information on the study characteristics based on full manuscripts. The disagreements were discussed between the 2 coders and reconciled by discussion.

|             |                                  |
|-------------|----------------------------------|
| Methods:    | Qualitative interviews           |
|             | Qualitative focus groups         |
|             | Cross-sectional                  |
|             | Longitudinal                     |
| Age group:  | Children (<18)                   |
|             | Adults (>18)                     |
|             | Both (range from < 18 to > 18)   |
| Country:    | Write the country name           |
| Medication: | Inhaled (e.g. ICS, LABAs, SABAs) |
|             | Other types (LTRA, OCS)          |
|             | Both (inhaled and other types)   |
|             | Not specified                    |

### **INCLUSION CRITERIA**

Based on the study characteristics extracted, one coder applied the inclusion criteria to the selected papers.

- Peer-reviewed article in English

- Empirical observational study (exclude conference abstracts, opinion papers, reviews)
- Age >18 (include studies with age range up to 19-20 years, and from <18 to >18)
- Medication adherence as outcome or mediator
- One or more predictors of medication adherence
- Medication type: inhaled (e.g. described as ICS, LABA, SABA, 'inhaled medication', 'inhaled controllers') (exclude studies that do not specify the type of medication addressed in adherence measurement or use generic measures for adherence, i.e. not specific to inhalers)
- Asthma (irrespective of severity) (if study addresses asthma as only one of several chronic conditions, include only if it analyses the asthma sample separately)
- Quantitative methodology (cross-sectional, longitudinal)
- Developed countries (based on UN Human Development Index, very high and high; [http://www.undp.org/content/dam/undp/library/corporate/HDR/2011%20Global%20HDR/English/HDR\\_2011\\_EN\\_Tables.pdf](http://www.undp.org/content/dam/undp/library/corporate/HDR/2011%20Global%20HDR/English/HDR_2011_EN_Tables.pdf))

## DATA EXTRACTION

Two coders perform data extraction independently. To clarify the data extraction categories and procedure, the coders discuss several articles that are not part of the review before starting the coding procedure. The 2 codes for the selected papers are compared and disagreements discussed.

**Study characteristics** (fill in the columns using the descriptions in the article manuscript)

- o Study objectives
- o country
- o setting (e.g. primary care, A&E, hospital)
- o population (sample size, age range, gender, asthma severity)
- o type of inhaled medication studied (ICS, LABA, etc)

**Quality of methodology** - criteria based on STROBE guidelines (see coding sheet)

1. Strobe 6 – Participants selection
2. Strobe 7 - Definition of variables
3. Strobe 8 - Sources of data and measurement
4. Strobe 9 - Addressing potential sources of bias
5. Strobe 10 - Study size justification
6. Strobe 11-12 – Data analysis

**Measurement & results** (see data\_extraction.xls)

- Definition of adherence
- Assessment of adherence (e.g. validated scale - specify -, other self-report measure, prescription vs refill records, canister weighting, electronic monitoring, other – specify -)
- Adherence determinants examined (examples in the table below)
- Measurement of determinant variables (validated scale, self-report question, etc.)
- Univariate analyses – tests, results & significance
- Multivariate analyses – tests, results & significance

**WHO Categorization:**

| Dimension | subdimensions | examples |
|-----------|---------------|----------|
|-----------|---------------|----------|

|                                             |                                            |                                                                                                                                                                                   |
|---------------------------------------------|--------------------------------------------|-----------------------------------------------------------------------------------------------------------------------------------------------------------------------------------|
| Social and economic factors                 | Family support                             | Financial support, emotional support, irregular supervision, child self-responsibility                                                                                            |
| Social and economic factors                 | Family/caregivers factors                  | Disorganized biologic families, family in conflict, low parental education level, family illness beliefs, number of people in household, number of adults involved in supervision |
| Social and economic factors                 | Social support                             | SS, low acculturation, low social functioning,                                                                                                                                    |
| Social and economic factors                 | Social stigma                              | High stigma, no/low disclosure                                                                                                                                                    |
| Social and economic factors                 | Costs of treatment                         | Co-payment, price of medication                                                                                                                                                   |
| Social and economic factors                 | Prescription coverage                      | Health insurance                                                                                                                                                                  |
| Social and economic factors                 | Socio-economic status                      | Low income, low SES, financial constraints                                                                                                                                        |
| Social and economic factors                 | Employment status                          | Unemployment, ES                                                                                                                                                                  |
| Social and economic factors                 | Community-related factors                  | Index crime rate in area of residence                                                                                                                                             |
| Social and economic factors                 | Area of residence                          | Rural/urban; geographical location                                                                                                                                                |
|                                             |                                            |                                                                                                                                                                                   |
| Health care team and system-related factors | Barriers to healthcare                     | access to health care facilities, distance from clinic, language barriers,                                                                                                        |
| Health care team and system-related factors | Medication supply                          | Unavailability of medication                                                                                                                                                      |
| Health care team and system-related factors | Type of health care professional           | Prescription by a generalist                                                                                                                                                      |
| Health care team and system-related factors | Education provision                        | Clarity of information, guidelines adherence by clinicians                                                                                                                        |
| Health care team and system-related factors | HCP-patient communication and relationship | Quality, duration, frequency of interactions, P-P communication, patient satisfaction with care, patient involvement in decision-making, doctor empathy                           |
| Health care team and system-related factors | Follow-up                                  | Discharge planning, follow-up planning                                                                                                                                            |
|                                             |                                            |                                                                                                                                                                                   |
| Condition-related factors                   | Presence of symptoms                       | Nighttime symptoms, morbidity index                                                                                                                                               |
| Condition-related factors                   | Asthma severity                            |                                                                                                                                                                                   |

|                           |                                |                                                                              |
|---------------------------|--------------------------------|------------------------------------------------------------------------------|
| Condition-related factors | Asthma exacerbations           |                                                                              |
| Condition-related factors | Health-related Quality of Life |                                                                              |
| Condition-related factors | Clinical improvement           |                                                                              |
| Condition-related factors | Duration                       |                                                                              |
|                           |                                |                                                                              |
| Therapy-related factors   | Adverse effects                |                                                                              |
| Therapy-related factors   | Patient-friendliness           | Complexity, dosing frequency, number of medications, instability of regimen, |
| Therapy-related factors   | Drug effectiveness             |                                                                              |
| Therapy-related factors   | Duration                       |                                                                              |
| Therapy-related factors   | Type of medication             |                                                                              |
| Therapy-related factors   | Self-management                |                                                                              |
|                           |                                |                                                                              |
| Patient-related factors   | Age                            |                                                                              |
| Patient-related factors   | Gender                         |                                                                              |
| Patient-related factors   | Marital status                 |                                                                              |
| Patient-related factors   | Education                      |                                                                              |
| Patient-related factors   | Ethnicity                      |                                                                              |
| Patient-related factors   | Housing                        |                                                                              |
| Patient-related factors   | Cognitive function             |                                                                              |
| Patient-related factors   | Knowledge of asthma            |                                                                              |
| Patient-related factors   | Knowledge of medication        |                                                                              |
| Patient-related factors   | Attitude                       |                                                                              |
| Patient-related factors   | General health beliefs         |                                                                              |
| Patient-related factors   | Illness beliefs                |                                                                              |
| Patient-related factors   | Treatment beliefs - positive   |                                                                              |
| Patient-related factors   | Treatment beliefs - negative   |                                                                              |
| Patient-related factors   | Self-efficacy/skills           |                                                                              |
| Patient-related factors   | Forgetfulness/reminders        |                                                                              |
| Patient-related factors   | Psychological profile          | Personality factors, locus of control                                        |

|                         |                       |  |
|-------------------------|-----------------------|--|
| Patient-related factors | Comorbidity           |  |
| Patient-related factors | Patient history       |  |
| Patient-related factors | Smoking status        |  |
| Patient-related factors | Symptom perception    |  |
| Patient-related factors | General health status |  |
